# 1 **Rapid genome sequencing for outbreak analysis of the emerging human fungal** 2 **pathogen *Candida auris***

3  
4 Johanna Rhodes<sup>1</sup>, Alireza Abdolrasouli<sup>2,3</sup>, Rhys A. Farrer<sup>1</sup>, Christina A. Cuomo<sup>4</sup>, David M. Aanensen<sup>1,5</sup>, Darius  
5 Armstrong-James<sup>2</sup>, Matthew C. Fisher<sup>1</sup>, Silke Schelenz<sup>2</sup>

6  
7 1 – Department of Infectious Disease Epidemiology, Imperial College London, London, United Kingdom

8 2 – National Heart and Lung Institute, Imperial College London, London, United Kingdom

9 3 – Department of Medical Microbiology, Charing Cross Hospital, Imperial College Healthcare NHS Trust,  
10 London, United Kingdom

11 4 – Broad Institute of MIT and Harvard, Cambridge, Massachusetts, USA

12 5 – The Centre for Genomic Pathogen Surveillance, Wellcome Trust Genome Campus, Cambridgeshire, UK

13  
14 Corresponding author(s): [S.Schelenz@rbht.nhs.uk](mailto:S.Schelenz@rbht.nhs.uk) and [Johanna.Rhodes@imperial.ac.uk](mailto:Johanna.Rhodes@imperial.ac.uk)

## 15 **Abstract**

16  
17  
18 **Background:** *Candida auris* was first described in 2009, and has since caused nosocomial outbreaks, invasive  
19 infections and fungaemia across 11 countries in five continents. An outbreak of *C. auris* occurred in a  
20 specialised cardiothoracic London hospital between April 2015 and November 2016, which to date has been the  
21 largest outbreak reported worldwide, involving a total of 72 patients.

22 **Methods:** To understand the epidemiology of *C. auris* infection within this hospital, we sequenced the genomes  
23 of outbreak isolates using Oxford Nanopore Technologies and Illumina in order to type antifungal resistance  
24 alleles and to explore the outbreak within its local and global context.

25 **Findings:** Phylogenomic analysis placed the UK outbreak in the India/Pakistan clade, demonstrating an Asian  
26 origin. The outbreak showed similar diversity to that of the entire clade and limited local spatiotemporal  
27 clustering was observed. One isolate displayed resistance to both echinocandins and 5-flucytosine; the former  
28 was associated with a serine to tyrosine amino acid substitution in the gene *FKSI*, and the latter was associated  
29 with a phenylalanine to isoleucine substitution in the gene *FURI*. These mutations are novel for this pathogen.

30 **Interpretation:** Multiple differential episodic selection of antifungal resistant genotypes has occurred within a  
31 genetically heterogenous population across this outbreak, creating a resilient pathogen and making it difficult to  
32 define local-scale patterns of transmission as well as implementing outbreak control measures.

33 **Funding:** Antimicrobial Research Collaborative, Imperial College London

## 34 **Introduction**

35  
36  
37 The emerging fungal pathogen *Candida auris* causes nosocomial invasive infections, predominantly in intensive  
38 care units (ICU). Since its first description in 2009 in Japan (1), reports of *C. auris* infections have been  
39 reported in several countries (2-10). *C. auris* demonstrates intrinsic multidrug resistant (MDR) phenotype (9),  
40 by exhibiting high level resistance to fluconazole and varying susceptibility to other azole drugs, amphotericin B  
41 and a newly introduced class of antifungals, echinocandins (9).

42  
43 In 2016, we described the first large-scale *C. auris* outbreak (April 2015 to November 2016) occurring within a  
44 single specialist cardiothoracic hospital in London (6). Due to the high uncertainty as to the time and source of  
45 introduction of *C. auris* into the hospital, the rapid development of a molecular epidemiological toolkit was  
46 required. Outbreaks of other fungal pathogens have been previously investigated using short-read whole-  
47 genome sequencing (WGS), which provided sufficient information to discriminate between isolates and their  
48 phylogenetic relationships using single nucleotide polymorphism (SNP) analysis (11-13). Recently, the  
49 handheld, portable MinION sequencer, manufactured by Oxford Nanopore Technologies, UK (ONT) has made  
50 rapid WGS widely available in the field, and has been successfully used to analyse the molecular epidemiology  
51 of recent *Salmonella*, and Ebola and Zika viruses outbreaks (14-16).

52

53 Here, we describe the first use of the MinION nanopore sequencing technology to determine the genetic  
54 epidemiology of this fungal outbreak, both within the UK hospital and also within a global context, alongside  
55 reannotating the genome of *C. auris* and defining novel antifungal resistance alleles.

## 56 57 **Methods**

### 58 59 Fungal isolates

60  
61 Twenty-eight *C. auris* isolates were studied, consisting of 26 clinical isolates from 22 patients and two isolates  
62 collected from the room of a patient known to be colonised with *C. auris* in the ICU (Table 1). The  
63 identification of *C. auris* was conducted by Matrix-assisted laser desorption/ionization Time of Flight (MALDI-  
64 TOF) mass spectrometry (Bruker Daltonics, Fremont, CA, USA) using a formic acid – acetonitrile extraction  
65 procedure. Scores were interpreted as >2.00 for species-level identification.

### 66 67 Library preparation and sequencing

68  
69 Five clinical isolates (Table 1) representing a 146-day time frame were chosen for sequencing using the hand-  
70 held MinION sequencer (Oxford Nanopore Technologies, Oxford, UK).

71  
72 Twenty-four isolates (Table 1), including the five clinical isolates sequenced using MinION, were chosen for  
73 Illumina sequencing using Nextera library preparation method as part of the MicrobesNG service (University of  
74 Birmingham, UK). These isolates represented a 155-day time frame, and included isolates from patients and the  
75 environment around infected patients. Isolates of *C. auris* for both MinION and Illumina sequencing were  
76 cultured as described in Supplementary Methods. All raw reads in this study have been submitted to the  
77 European Nucleotide Archive under the project accession PRJEB20230. Details of genome assembly and  
78 annotation are described in Supplementary Methods.

### 79 80 Alignment of Illumina reads and phylogenetic analysis

81  
82 Raw Illumina reads were quality checked using FastQC (v0.11.3; Babraham Institute), and trimmed using  
83 Trimmomatic (v0.30) based on a Phred quality score of 15. Alignment of reads to the 16B25 reference genome  
84 and variant calling were carried out as described in Rhodes and colleagues (17).

85  
86 Phylogenies for whole genome SNP data were constructed and visualised as described in Rhodes and colleagues  
87 (17). The rate of evolution (represented as the number of substitutions per day) along the tree topology was  
88 estimated using TempEst v1.5 (18), calibrated with sampling times. Root-to-tip regression was calculated and  
89 the root of the tree was selected to maximise  $R^2$ .

### 90 91 Mutation identification in *ERG11*, *FKS1* and *FURI* genes

92  
93 Orthologous sequences to *C. albicans* *ERG11* (SC5314) were extracted from each *C. auris* genome. Sequences  
94 were evaluated for amino acid substitutions to mutations within hot spot regions in *C. albicans* (19) as described  
95 in Lockhart and colleagues (9). Predicted *FKS1* and *FURI* genes from the genome annotation were used to  
96 identify presence or absence of mutations in *C. auris* isolates.

## 97 98 **Results**

99  
100 We sequenced 25 clinical *C. auris* isolates from a recently described outbreak (6), along with two environmental  
101 samples to better represent the overall genetic diversity within the impacted hospital. We also sequenced eight  
102 isolates derived from four patients taken days apart to establish possible within-patient diversity.

### 103 104 Rapid generation of outbreak-specific *C. auris* reference genome and Illumina sequencing

105

106 We assembled five high quality hybrid *de novo* reference genomes for *C. auris* using Illumina short-read  
107 sequences and MinION long-read sequences rapidly generated over 48 hours. Five isolates (15B5, 16B21,  
108 16B25, 16B20 and 16B15a) were chosen to cover a range of dates (October 2015 to March 2016). Isolate 16B25  
109 had the best overall assembly quality of 110 contigs,  $N_{50} = 396,317$  bp and an estimated genome size of 12.3 Mb  
110 (Table 3 and Supplementary Table S1). 98-94% of the 16B25 assembly mapped to the *C. auris* genome B8441  
111 assembled by Lockhart and colleagues (9).

112

113 We generated an average of 5.2 million Illumina reads passing quality control for 27 isolates recovered during  
114 the outbreak that mapped closely (average 95.5%) to our reference genome (Supplemental Material Table S2).  
115 The rapid availability of long reads from MinION sequencing demonstrates this technology is ideally used in an  
116 outbreak setting for providing high-quality contiguous assemblies. A total of 5,366 protein-coding genes, 4  
117 rRNAs and 156 tRNAs were predicted using the genome annotation pipeline described in Supplementary  
118 Methods. Table 3 summarises the general features of 16B25, along with other pathogenic *Candida* genomes.  
119 The number of protein coding genes presented here is in line with the predicted number of genes in *C. lusitanae*  
120 (20) ( $n = 5,941$ ), the closest known relative of *C. auris*.

121

122 There are fewer protein coding genes, tRNAs and rRNAs predicted in this genome than previously reported for  
123 *C. auris* Ci 6684 in Chatterjee and colleagues (21), as shown in Table 3. Running our annotation pipeline on the  
124 B8441 isolate presented in Lockhart and colleagues (9) found similar numbers of protein coding genes, rRNAs  
125 and tRNAs (Table 3). Therefore, the different total numbers between 16B25 and Ci 6684 are likely due to the  
126 different annotation pipelines and not the quality of the reference assemblies. The number of protein coding  
127 genes identified in Chatterjee and colleagues is likely inflated due to over-prediction of short sequences, lack of  
128 filtering of repetitive sequences, and using only GenemarkS to predict the start of genes; our pipeline used  
129 additional criteria to achieve a predicted set of high-confidence genes.

130

### 131 Phylogenetic analysis reveals an Indian/Pakistani origin of *C. auris* outbreak

132

133 Phylogenetic analysis based on whole genome SNPs revealed the UK outbreak had an Indian/Pakistani origin  
134 (Figure 1). SNP calls for isolates from Venezuela, India, Pakistan, Japan and South Africa (9) were also  
135 included to add geographic context to the outbreak. The UK outbreak isolates were in the same clade as those  
136 from India and Pakistan (Figure 1a); on average, 240 SNPs separated UK outbreak isolates from isolates  
137 collected in India and Pakistan. There were no known patient travel links to India or Pakistan prior to admission  
138 into hospital, however. We found an average of 84 SNPs separating isolates within the UK outbreak; later  
139 isolates exhibited only 55 SNPs between them (October 2016), compared to earlier isolates (January 2016) that  
140 showed an average 130 SNPs separating them.

141

142 Fitting root-to-tip regression showed there was a linear relationship between sampling time (days) and the  
143 expected number of nucleotide substitutions along the tree, demonstrating clock-like evolution across the time-  
144 scale of the outbreak (Figure 2). The evolutionary rate of nuclear DNA (calculated from the slope of the  
145 regression) equated to  $1.5204 \times 10^{-3}$  substitutions per site, comparable with nuclear DNA of other fungal species  
146 such as *Schizosaccharomyces pombe* beer strains ( $3.0 \times 10^{-3}$  (22)) and *Saccharomyces cerevisiae* ( $5.7 \times 10^{-3}$  (23)). The  
147 time to the most recent common ancestor (TMRCA) was estimated to be early March 2015, one month prior to  
148 the first patient identified with a *C. auris* infection. One isolate, 16B22b, was identified as being less diverged  
149 than average for the sampling date; five isolates (16B15b, 16B26, 16B25, 16B22a and 16B24a) were identified  
150 as being more diverged than average for the sampling date given.

151

### 152 Clinical isolates of *C. auris* show multi-drug resistance

153

154 Overall, 14 isolates displayed MDR to two or more classes of antifungal drugs. Only five isolates displayed  
155 resistance to one drug, fluconazole. All isolates expressed elevated levels of resistance to fluconazole (MIC:  
156  $>256$  ug/ml), with varying levels of resistance to itraconazole (MIC: 0.03 ug/ml -  $>16$  ug/ml), voriconazole

157 (MIC: 0.12 ug/ml - 8 ug/ml) and posaconazole (which has not been previously reported in *C. auris*). Four  
158 isolates also displayed resistance to amphotericin B (MIC: >2 ug/ml).

159  
160 One isolate (16B15b) displayed elevated levels of resistance to all echinocandins (MIC: >8 ug/ml), but  
161 remained susceptible to all azole drugs, with the exception to fluconazole. 16B15b also displayed high levels of  
162 resistance to flucytosine (MIC >64 ug/ml), which was not seen in the other isolates; therefore, both mutations  
163 and associated resistance were unique to this outbreak isolate. This isolate belonged to a patient who received  
164 anidulafungin for 7 days for pancolitis, developing *C. auris* candidaemia 11 days afterwards, at which point  
165 isolate 16B15a was recovered. Treatment was switched to amphotericin and 5-flucytosine for 2 weeks. Six days  
166 after completing this treatment, a pan-resistant *C. auris* (16B15b) was recovered from the vascular tip. One non-  
167 synonymous SNP (nsSNP), causing a serine to tyrosine substitution (S652Y) was identified in the *C. auris*  
168 *FKSI* gene; a similar mutation (S645Y) in *FKSI* has been associated with echinocandin resistance in *C.*  
169 *albicans* (24). Another nsSNP caused a phenylalanine to isoleucine substitution (F211I) in *FURI*, which has a  
170 role in 5-flucytosine resistance (25). Neither of these mutations have been reported previously.

171  
172 Orthologous sequences to *C. albicans ERG11* were screened for substitutions that conferred known fluconazole  
173 resistance mutations (19). The outbreak isolates all had the Y132F substitution in *ERG11*, confirming an  
174 Indian/Pakistani origin. Lockhart and colleagues also found that these substitutions were strongly correlated  
175 with geographic clades (9).

176  
177 Interpretation of typing results in relation to epidemiology of the outbreak  
178

179 *C. auris* outbreak isolates grouped into two phylogenetic clusters (A and B; 26% and 74% respectively) (Figure  
180 1b). Cluster A comprised seven isolates from 2016 that had on average 245 SNPs that distinguished it from  
181 Cluster B. On average 130 SNPs separated isolates within Cluster B. Cluster A was introduced into the hospital  
182 in early 2016 and formed the dominant outbreak strains towards the end of the outbreak, with only 55 SNPs  
183 separating those isolates. The phenotypic antifungal resistance varied among these isolates: all expressed high  
184 level fluconazole resistance (MIC: 128-256 ug/ml) and susceptibility to echinocandins (micafungin, caspofungin  
185 and anidulafungin MIC: 0.06-0.12 ug/ml) and 5-flucytosine (MIC 0.06 ug/ml), two clinical isolates expressed  
186 cross azole resistance (MIC: 4-8 ug/ml posaconazole, 8 ug/ml voriconazole, 2-16 ug/ml itraconazole).  
187 Phenotypic antifungal susceptibility profiling may therefore not be used reliably for addressing genetically  
188 indistinguishable strains during nosocomial transmission analysis.

189  
190 Three patients with isolates in Cluster A were admitted to the ICU. Two patients acquired *C. auris* whilst  
191 staying in ICU, and another patient acquired *C. auris* on a surgical admission unit geographically placed next  
192 door to the high dependency unit in the same month, but not overlapping with the ICU patients. Transmission of  
193 *C. auris* between different units within this hospital likely occurred *via* the movement of *C. auris*-positive  
194 patients or contaminated equipment. However, because we did not sequence isolates from all patients during the  
195 outbreak alongside the heterogeneous nature of the founding population, we are currently unable to establish  
196 routes of transmission in more detail.

197  
198 Analysis and interpretation of sequencing result in relation to epidemiology of individual patient transmission  
199 during the outbreak  
200

201 Eight isolates within this study were sequential pairs of isolates from four separate patients (Table 1); we  
202 hypothesised that there may have been nosocomial horizontal transmission between patients and/or their  
203 surrounding environment, as suggested in previous studies (2,3,5,26), for the following pairs of isolates: 16B22a  
204 and 16B22b from patient A (isolated 12 days apart); 16I27a (MICs were not carried out for this isolate) and  
205 16B27b from patient B (isolated 1 day later); 16B24a and 16B24b from patient C (isolated 5 days apart); and  
206 16B15a and 16B15b from patient D (isolated 32 days apart).

207

208 In patient A, 16B22a (recovered from the axilla) showed resistance to fluconazole only (Table 2). The  
209 subsequent isolate from this patient, 16B22b (isolated from a central line tip) exhibited resistance to all azole  
210 drugs (Table 2). A large number of SNPs (277 SNPs) separated the two isolates (Figure 1), which also separated  
211 into different phylogenetic clusters (16B22a in Cluster B and 16B22b in Cluster A) suggesting independent  
212 acquisition of infection by this patient within the unit. The two isolates from patient B similarly differed by a  
213 large number of SNPs (164 SNPs), but were both placed in Cluster B. Given that 16I27a (from a body screen  
214 sample) was isolated one day prior to 16B27b (recovered from a positive blood culture), it is likely that this  
215 patients diversity represents an heterogenous infecting population. In patient C, 16B24b was isolated from a  
216 clinical pacing wire sampled five days after the initial isolation of 16B24a from sputum sample. These two  
217 isolates differ by over 400 SNPs, shown by their disparate position in the phylogeny (Figure 1) with 16B24a  
218 placed in Cluster A, and 16B24b placed in Cluster B. 16B15b showed raised MICs to all echinocandins and  
219 flucytosine, which was not displayed in 16B15a. These two isolates were separated by only 120 SNPs, and were  
220 phylogenetically placed in Cluster B (Figure 1b). Our results suggest that none of these patients were infected  
221 with a single, clonally propagating *C. auris* strain, and instead the hospital (and all patients) was seeded with a  
222 genetically heterogenous population.

223

224 Three isolates (16B25, 16B20,16I29a) clustered closely together with only 99 SNPs difference. 16I29a was  
225 recovered from the environment around a *C. auris*-positive patient (the isolate was not sequenced). The patient  
226 from which 16B20 was recovered was present in an adjacent side room at the same time, suggesting a potential  
227 transmission between these patients. However, it remains unclear how the organism may have been transferred  
228 between the two rooms and patients. The third isolate of this cluster (16B25) was recovered from a patient  
229 present in the same room where 16I29a was recovered. The patient was placed in this room 22 days after the  
230 previous *C. auris*-positive patient had left the room, and became positive within 14 days of being in this  
231 isolation room.

232

233 Isolates 15B5, 16B15b and 16B21 are phylogenetically related (separated by 95 SNPs; Figure 1b), and were  
234 recovered from patients sharing the same bay. The bay was initially populated with the patient from whom  
235 isolates 15B5 and 16B15b were recovered, and then saw the introduction of the patient from which 16B21  
236 was recovered. Both examples of spatiotemporal clustering suggest that there may be environmental persistence of  
237 *C. auris* resulting in transmission to patients.

238

## 239 Discussion

240

241 *C. auris* is an MDR fungal pathogen, capable of causing invasive infections. Here we report WGS of *C. auris*  
242 infections from the largest outbreak to date, occurring between April 2015 and November 2016 in a London  
243 hospital ICU which spread to two other wards.

244

245 A gold standard reference genome for the outbreak was assembled using long MinION-generated reads, and  
246 Illumina short reads. Whilst the GC bias and base quality in >80% GC regions of the genome was similar in  
247 both Illumina and MinION sequencing, Illumina was more consistent across the whole genome (Figure S1).  
248 MinION reads displayed wide variation in base quality in >85% AT regions, ranging from a quality score of  
249 zero to 1.4, whereas Illumina reads ranged between quality scores of 0.75 and 0.85 for regions >85% AT. ONT  
250 has since released new chemistry that improves read quality, and therefore the variant calling, which will  
251 provide a competitive alternative to Illumina sequencing in both outbreak settings and routine research.

252

253 The speed of the MinION sequencer allowed rapid assembly and mapping of Illumina short reads to call high-  
254 confidence SNPs, which is of great importance in an outbreak (14,15). SNPs in *ERG11* correlated with known  
255 *C. albicans* hotspots (19) conferring resistance to the frontline drug fluconazole. All *C. auris* isolates in this  
256 study that exhibited high MICs to fluconazole (>250 ug/ml) contained amino acid substitutions known to cause  
257 resistance to fluconazole (19). Fourteen isolates were MDR, posing an important clinical challenge in the  
258 treatment of *C. auris* infections. Within this study we have also highlighted resistance to posaconazole, which

259 has not previously been reported in *C. auris*, alongside echinocandin and flucytosine resistance in one MDR  
260 isolate.

261  
262 Echinocandin resistance is linked to mutations in the *FKS* genes in other *Candida* species (27), and our analysis  
263 identified the S645Y mutation in *FKSI* in an echinocandin-resistant isolate. Flucytosine resistance was observed  
264 in the same isolate, and was associated with the F211I mutation in *FURI*. Our analysis suggests that systemic  
265 echinocandin and flucytosine treatment can rapidly select for resistant genotypes across the outbreak timescale.  
266 Rapid MinION sequencing of *C. auris* isolates would allow drug resistance mutation identification, providing  
267 time-sensitive information in a clinical setting.

268  
269 Phylogenomic analysis showed weak support for monophyletic status of isolates within the hospital, suggesting  
270 multiple introductions of *C. auris* occurred. On average, only 240 SNPs separated the UK outbreak isolates  
271 from the Indian/Pakistani clade, clearly showing the UK outbreak had an Asian origin. When compared to other  
272 sequenced Asian *C. auris* isolates (Table S3) in Lockhart and colleagues (9), these SNP numbers suggest an  
273 anomalous amount of diversity within this outbreak. Future alignments will require clade-specific references  
274 due to the large evolutionary distances between South America/Africa and the Indian/Pakistani clades. Although  
275 the mode of introduction into the UK is unknown, temporal analysis of the outbreak isolates placed the most  
276 recent common ancestor as early March 2015, which correlates closely to the first confirmed infection within  
277 the hospital one month after this, suggesting a recent introduction into the UK.

278  
279 Only one third of SNPs were shared between hospital environment isolates (bed and trolley of a confirmed *C.*  
280 *auris* infected patient). *C. auris* was also recovered from inanimate surfaces, suggesting a population of  
281 genotypes are capable of contaminating the hospital environment, causing onward infection of human hosts (9).  
282 Given SNP differences between isolates recovered from the same patient at different bodily locations (Patients  
283 A, B and C), either the outbreak diversity is due to multiple introductions, which is unlikely as all patients  
284 screened negative for *C. auris* upon admission, or a genetically heterogeneous population seeded the hospital.  
285 Further, given the substantial number of SNPs separating the two isolates that were recovered from Patient C 24  
286 hours apart, it appears clear that genetically disparate isolates are capable of infecting the same host at the same  
287 time. The genomic diversity of *C. auris* within this outbreak makes mapping local-scale transmission events  
288 difficult as genetic bottlenecks may result in rapid changes in allele frequencies within local spatiotemporal  
289 scales. Clearly, sequencing multiple isolates of *C. auris* from patients alongside those from other UK outbreak  
290 settings is needed to more finely resolve the population genomic structure of this pathogen in order to  
291 understand transmission dynamics.

292  
293 This study represents the first use of ONT MinION sequencer on a human fungal pathogen. The association of  
294 nsSNPs in *FKSI* and *FURI* with echinocandin and flucytosine resistance respectively are both clinically  
295 relevant and novel. Further investigation into these mutations is required to confirm these associations.  
296 Epidemiological analysis suggests that contact tracing was not sufficient to resolve fine-scale spatiotemporal  
297 processes across the outbreak due to the multiple differential episodic selection occurring across a genetically  
298 heterogeneous *C. auris* population. Future research into *C. auris* should focus on sequencing many isolates from  
299 the same patient, from multiple body sites, in order to correctly establish the nature of persistence and  
300 transmission of *C. auris* within hospital environments; the genomic approaches underpinning this study will  
301 likely be cornerstones of future research into this increasingly important infectious disease.

### 302 303 **Acknowledgements**

304  
305 We thank Oxford Nanopore Technologies for their generous contribution of flow cells and nanopore sequencing  
306 kits. We also wish to extend our thanks to Nicholas J. Loman (University of Birmingham) for providing insight  
307 into the initial conception of experiments, and to Anastasia Litvintseva, Nancy A. M. Chow and Kizee Etienne  
308 (Centers for Disease Control, USA) for the provision of additional sequence data. We also thank the sequencing  
309 team at Wellcome Trust Sanger Institute for sequencing four of the isolates presented here.

310

311 J.R. was supported by an Antimicrobial Research Collaborative (ARC) early career research fellowship  
312 (RSRO\_54990).  
313  
314 R.A.F. was supported by an MIT/Wellcome Trust Fellowship.  
315  
316 M. C. F. was supported by the Natural Environmental Research Council.  
317  
318 D. A-J was supported by NERC and the Wellcome Trust.  
319  
320 C. A. C was supported by the National Institute of Allergy and Infectious Diseases, National Institutes of  
321 Health, Department of Health and Human Services, under grant number U19AI110818.  
322  
323 D. M. A. supported by the Wellcome Trust (Grant no. 099202)  
324  
325 Genome sequencing was provided by MicrobesNG (<http://www.microbesng.uk>), which is supported by the  
326 BBSRC (grant number BB/L024209/1)  
327  
328 **Author contributions**  
329  
330 Clinical and outbreak data analysis: S.S.  
  
331 Collected isolates: S.S.  
  
332 Conceived experiments: J.R., M.C.F., D.A-J., S.S.  
  
333 DNA extractions: A.A., J.R.  
  
334 MinION DNA sequencing: J.R.  
  
335 Illumina sequencing: D.M.A. and MicrobesNG  
  
336 Bioinformatic analysis: J.R.  
  
337 Genome annotation: R.A.F., C.A.C.  
  
338 Manuscript preparation: J.R., R.A.F., A.A, S.S.

### 339 **Tables**

340

341 **Table 1: Clinical isolates of *C. auris* included in this study**

342

| Isolate ID | Sequencing technology | Isolate date | Site               | Origin      |
|------------|-----------------------|--------------|--------------------|-------------|
| 15B5       | MinION, Illumina      | 19/10/2015   | Vascath site       | Patient     |
| 15B6       | Illumina              | 22/10/2015   | Swan ganz tip      | Patient     |
| 15B10      | Illumina              | 28/12/2015   | Groin swab         | Patient     |
| 16B12      | Illumina              | 04/01/2016   | Axilla             | Patient     |
| 16B13      | Illumina              | 11/01/2016   | Fem picco site     | Patient     |
| 16I29b     | Illumina              | 18/01/2016   | Bed                | Environment |
| 16I29a     | Illumina              | 18/01/2016   | Bed window trolley | Environment |
| 16B18      | Illumina              | 01/02/2016   | CVP tip arm        | Patient     |
| 16B15a     | MinION, Illumina      | 06/02/2016   | Blood culture      | Patient D   |
| 16I17      | Illumina              | 08/02/2016   | Screen             | Patient     |
| 16B20      | MinION, Illumina      | 16/02/2016   | Blood culture      | Patient     |
| 16B16      | Illumina              | 21/02/2016   | Urine catheter     | Patient     |

|        |                  |            |                 |           |
|--------|------------------|------------|-----------------|-----------|
| 16B21  | MinION, Illumina | 22/02/2016 | Axilla swab     | Patient   |
| 16B22a | Illumina         | 27/02/2016 | Axilla swab     | Patient A |
| 16B24a | Illumina         | 07/03/2016 | Sputum          | Patient C |
| 16B22b | Illumina         | 09/03/2016 | CVP tip femoral | Patient A |
| 16B15b | Illumina         | 09/03/2016 | CVP tip         | Patient D |
| 16B24b | Illumina         | 12/03/2016 | Pacing wire     | Patient   |
| 16B25  | MinION, Illumina | 13/03/2016 | ECMO site       | Patient C |
| 16I27a | Illumina         | 14/03/2016 | Screen          | Patient B |
| 16B26  | Illumina         | 14/03/2016 | SCMO site       | Patient   |
| 16B27b | Illumina         | 15/03/2016 | Blood culture   | Patient B |
| 16I30  | Illumina         | 21/03/2016 | Screen          | Patient   |
| 16I33  | Illumina         | 16/06/2016 | Groin           | Patient   |
| 16B31  | Illumina         | 16/10/2016 | CVP line site   | Patient   |
| 16B30  | Illumina         | 17/10/2016 | Groin           | Patient   |
| 16I34  | Illumina         | 23/10/2016 | Axilla swab     | Patient   |

343  
344  
345  
346  
347  
348  
349

**Table 2: MICs at time of isolation of all isolates included in this study. MICs deemed above these breakpoint values (based on *Candida albicans* CSLI), and therefore resistant, are shaded in grey. ANI = Anidulafungin; MICA = micafungin; CAS = Caspofungin; 5FC = 5-fluorocytosine; POS = posaconazole; VOR = voriconazole; ITR = itraconazole; FLU = fluconazole; AmpB = Amphotericin B. N/A = No MICs carried out.**

| Isolate ID | ANI  | MICA | CAS  | 5FC  | POS   | VOR  | ITR   | FLU | AmpB |
|------------|------|------|------|------|-------|------|-------|-----|------|
| 15B5       | 0-12 | 0-12 | 0-25 | 0-12 | 8     | 8    | 16    | 256 | 2    |
| 15B6       | 0-06 | 0-06 | 0-06 | 0-06 | 0-015 | 0-25 | 0-06  | 256 | 1    |
| 15B10      | 0-12 | 0-12 | 0-5  | 0-12 | 8     | 8    | 16    | 256 | 2    |
| 16B12      | 0-12 | 0-12 | 0-5  | 0-25 | 8     | 8    | 16    | 256 | 2    |
| 16B13      | 0-12 | 0-12 | 0-25 | 0-06 | 0-03  | 0-5  | 0-06  | 256 | 1    |
| 16I29b     | N/A  | N/A  | N/A  | N/A  | N/A   | N/A  | N/A   | N/A | N/A  |
| 16I29a     | N/A  | N/A  | N/A  | N/A  | N/A   | N/A  | N/A   | N/A | N/A  |
| 16B18      | 0-25 | 0-25 | 1    | 0-06 | 0-12  | 2    | 0-12  | 256 | 1    |
| 16B15a     | 0-12 | 0-06 | 0-12 | 0-06 | 0-008 | 0-06 | 0-015 | 16  | 0-5  |
| 16I17      | N/A  | N/A  | N/A  | N/A  | N/A   | N/A  | N/A   | N/A | N/A  |
| 16B20      | 0-06 | 0-12 | 0-5  | 0-06 | 8     | 8    | 16    | 256 | 1    |
| 16B16      | 0-12 | 0-12 | 0-25 | 0-06 | 0-03  | 0-25 | 0-03  | 256 | 1    |
| 16B21      | 0-12 | 0-12 | 0-25 | 0-06 | 0-12  | 0-5  | 0-03  | 16  | 1    |
| 16B22a     | 0-12 | 0-12 | 0-25 | 0-06 | 0-008 | 0-25 | 0-03  | 128 | 0-5  |
| 16B24a     | 0-12 | 0-12 | 0-5  | 0-06 | 8     | 8    | 8     | 256 | 2    |
| 16B22b     | 0-12 | 0-12 | 0-25 | 0-06 | 4     | 8    | 2     | 256 | 1    |
| 16B24b     | 0-12 | 0-12 | 0-25 | 0-06 | 8     | 8    | 2     | 256 | 1    |
| 16B25      | 0-12 | 0-12 | 0-25 | 0-06 | 0-03  | 0-12 | 0-03  | 64  | 1    |
| 16I27a     | N/A  | N/A  | N/A  | N/A  | N/A   | N/A  | N/A   | N/A | N/A  |
| 16B26      | 0-12 | 0-12 | 0-25 | 0-06 | 8     | 8    | 16    | 256 | 1    |
| 16B27b     | 0-12 | 0-12 | 1    | 0-12 | 8     | 8    | 16    | 256 | 0-5  |
| 16I30      | 0-25 | 0-12 | 0-5  | 0-12 | 8     | 8    | 16    | 256 | 2    |
| 16B15b     | 8    | 8    | 8    | 64   | 0-015 | 0-25 | 0-03  | 8   | 1    |
| 16B30      | 0-12 | 0-06 | 0-12 | 0-06 | 0-15  | 0-5  | 0-06  | 128 | 1    |
| 16B31      | 0-12 | 0-06 | 0-12 | 0-06 | 0-03  | 0-5  | 0-06  | 256 | 1    |
| 16I33      | 0-06 | 0-06 | 0-06 | 0-06 | 0-06  | 0-06 | 0-03  | 128 | 0-5  |
| 16I34      | 0-06 | 0-06 | 0-06 | 0-06 | 0-008 | 0-25 | 0-03  | 256 | 0-5  |

350  
351  
352  
353  
354

**Table 3: Summary of assembly and annotation statistics of the *C. auris* 16B25 genome, the *C. auris* B8441 reference (9), the *C. auris* Ci 6684 reference (21), and other pathogenic *Candida* species reference genomes (20)**

| Species | Genome size (Mb) | Number of chromosomes or scaffolds | GC content (%) | Number of protein coding genes | Average CDS size (bp) | Ploidy |
|---------|------------------|------------------------------------|----------------|--------------------------------|-----------------------|--------|
|         |                  |                                    |                |                                |                       |        |



|                               |      |     |       |      |      |         |
|-------------------------------|------|-----|-------|------|------|---------|
| <i>C. auris</i> (16B25)       | 12-3 | 110 | 45-13 | 5366 | 1564 | Haploid |
| <i>C. auris</i> (B8441)       | 12-4 | 19  | 45-13 | 5439 | 1548 | Haploid |
| <i>C. auris</i> (Ci 6684)     | 12-5 | 99  | 44-53 | 8358 | 1025 | Haploid |
| <i>C. albicans</i> SC5314     | 14-3 | 7   | 33-5  | 6107 | 1468 | Diploid |
| <i>C. tropicalis</i> MYA-3404 | 14-5 | 24  | 33-1  | 6163 | 1454 | Diploid |
| <i>C. parapsilosis</i>        | 13-1 | 24  | 38-7  | 5733 | 1533 | Diploid |
| <i>C. lusitaniae</i>          | 12-1 | 9   | 44-5  | 5941 | 1382 | Haploid |

355

356

## Figure legends

357

358

359

360

361

362

363

364

365

366

367

368

369

370

371

372

373

374

**Figure 1** – Phylogenetic analysis of *C. auris* isolates with bootstrap support (500 replicates) performed on WGS SNP data to generate unrooted maximum-likelihood phylogenies. Branches supported to 75% or higher unless otherwise stated. Branch lengths represent the average expected rates of substitution per site. **a)** Outbreak isolates from the UK (shown in blue) were combined with isolates from around the globe, including India (orange), Pakistan (red), Venezuela (pink), Japan (turquoise), and South Africa (green), to infer a possible geographical origin. Isolates with known mutations in the *ERG11* gene associated with resistance to fluconazole in *C. albicans* are shaded: Y132F as red, and F126L as blue **b)** Given the likely Indian/Pakistani origin of the outbreak isolates, phylogenetic analysis was repeated (as stated above), excluding isolates from South Africa, Venezuela and Japan to illustrate the UK outbreak. Isolates separating either into Cluster A (green) or B (purple) are depicted to infer likely introductions into the hospital.

375

376

377

378

379

380

381

382

383

384

385

386

387

388

389

390

391

392

393

**Figure 2** – Root-to-tip regression analysis of all 28 *C. auris* outbreak isolates. Genetic distance is plotted against sampling time for the phylogeny of the *C. auris* outbreak. Each data point represents a tip on the phylogeny. The  $R^2$  for the regression and the slope, reflecting the evolutionary rate (in substitutions per site per day) is also shown.

## References

1. Satoh K, Makimura K, Hasumi Y, Nishiyama Y, Uchida K, Yamaguchi H. *Candida auris* sp. nov., a novel ascomycetous yeast isolated from the external ear canal of an inpatient in a Japanese hospital. *Microbiology and Immunology*. Blackwell Publishing Asia; 2009 Jan 1;53(1):41–4.
2. Chowdhary A, Sharma C, Duggal S, Agarwal K, Prakash A, Singh PK, et al. New clonal strain of *Candida auris*, Delhi, India. *Emerging Infect Dis*. 2013 Oct;19(10):1670–3.
3. Lee WG, Shin JH, Uh Y, Kang MG, Kim SH, Park KH, et al. First three reported cases of nosocomial fungemia caused by *Candida auris*. *J Clin Microbiol*. American Society for Microbiology; 2011 Sep;49(9):3139–42.
4. Magobo RE, Corcoran C, Seetharam S, Govender NP. *Candida auris*-associated candidemia, South Africa. *Emerging Infect Dis*. 2014 Jul;20(7):1250–1.
5. Calvo B, de Azevedo Melo AS, Perozo-Mena A, Hernandez M, Francisco EC, Hagen F, et al. First report of *Candida auris* in America: clinical and microbiological aspects of 18 episodes of candidemia. *Journal of Infection*. Elsevier Ltd; 2016 Jul 20;:1–24.
6. Schelenz S, Hagen F, Rhodes JL, Abdolrasouli A, Chowdhary A, Hall A, et al. First hospital outbreak of the globally emerging *Candida auris* in a European hospital. *Antimicrobial Resistance & Infection Control*. *Antimicrobial Resistance & Infection Control*; 2016 Oct 12;:1–7.
7. Ben-Ami R, Berman J, Novikov A, Bash E, Shachor-Meyouhas Y, Zakin S, et al. Multidrug-Resistant *Candida haemulonii* and *C. auris*, Tel Aviv, Israel. *Emerging Infect Dis*. 2017 Feb;23(1).

- 394 8. Schwartz IS, Hammond GW. First reported case of multidrug-resistant *Candida auris* in Canada. *Canada*  
395 *Communicable Disease Report*. 2017 Jul 10;43(7/8):150–3.
- 396 9. Lockhart SR, Etienne KA, Vallabhaneni S, Farooqi J, Chowdhary A, Govender NP, et al. Simultaneous  
397 emergence of multidrug resistant *Candida auris* on three continents confirmed by whole genome  
398 sequencing and epidemiological analyses. *CLIN INFECT DIS*. Oxford University Press;  
399 2017;64(2):134–40.
- 400 10. Prakash A, Sharma C, Singh A, Kumar Singh P, Kumar A, Hagen F, et al. Evidence of genotypic  
401 diversity among *Candida auris* isolates by multilocus sequence typing, matrix-assisted laser desorption  
402 ionization time-of-flight mass spectrometry and amplified fragment length polymorphism. *Clin*  
403 *Microbiol Infect*. 2016 Mar;22(3):277.e1–9.
- 404 11. Litvintseva AP, Hurst S, Gade L, Frace MA, Hilsabeck R, Schupp JM, et al. Whole-genome analysis of  
405 *Exserohilum rostratum* from an outbreak of fungal meningitis and other infections. Land GA, editor. *J*  
406 *Clin Microbiol*. 2014 Sep;52(9):3216–22.
- 407 12. Etienne KA, Gillece J, Hilsabeck R, Schupp JM, Colman R, Lockhart SR, et al. Whole genome  
408 sequence typing to investigate the *Apophysomyces* outbreak following a tornado in Joplin, Missouri,  
409 2011. Jordan IK, editor. *PLoS ONE*. 2012;7(11):e49989.
- 410 13. Engelthaler DM, Chiller T, Schupp JA, Colvin J, Beckstrom-Sternberg SM, Driebe EM, et al. Next-  
411 Generation Sequencing of *Coccidioides immitis* Isolated during Cluster Investigation. *Emerging Infect*  
412 *Dis*. Centers for Disease Control and Prevention; 2011 Feb 1;17(2):227–32.
- 413 14. Quick J, Ashton P, Calus S, Chatt C, Gossain S, Hawker J, et al. Rapid draft sequencing and real-time  
414 nanopore sequencing in a hospital outbreak of *Salmonella*. *Genome Biol*. *Genome Biology*; 2015 Jun  
415 29;:1–14.
- 416 15. Quick J, Loman NJ, Duraffour S, Simpson JT, Severi E, Cowley L, et al. Real-time, portable genome  
417 sequencing for Ebola surveillance. *Nature*. Nature Publishing Group; 2016 Feb 3;:1–17.
- 418 16. Faria NR, Sabino EC, Nunes MRT, Alcantara LCJ, Loman NJ, Pybus OG. Mobile real-time  
419 surveillance of Zika virus in Brazil. *Genome Medicine*. *BioMed Central*; 2016 Sep 29;8(1):97.
- 420 17. Rhodes J, Beale MA, Vanhove M, Jarvis JN, Kannambath S, Simpson JA, et al. A Population Genomics  
421 Approach to Assessing the Genetic Basis of Within-Host Microevolution Underlying Recurrent  
422 Cryptococcal Meningitis Infection. *G3 (Bethesda)*. 2017 Apr 3;7(4):1165–76.
- 423 18. Rambaut A, Lam TT, Max Carvalho L, Pybus OG. Exploring the temporal structure of heterochronous  
424 sequences using TempEst (formerly Path-O-Gen). *Virus Evol*. The Oxford University Press; 2016 Apr  
425 10;2(1):vew007–7.
- 426 19. Morio F, Loge C, Besse B, Hennequin C, Le Pape P. Screening for amino acid substitutions in the  
427 *Candida albicans* Erg11 protein of azole-susceptible and azole-resistant clinical isolates: new  
428 substitutions and a review of the literature. *Diagnostic Microbiology and Infectious Disease*. Elsevier  
429 Inc; 2010 Apr 1;66(4):373–84.
- 430 20. Butler G, Rasmussen MD, Lin MF, Santos MAS, Sakthikumar S, Munro CA, et al. Evolution of  
431 pathogenicity and sexual reproduction in eight *Candida* genomes. *Nature*. Nature Publishing Group;  
432 2009 Jun 4;459(7247):657–62.
- 433 21. Chatterjee S, Alampalli SV, Nageshan RK, Chettiar ST, Joshi S, Tatu US. Draft genome of a commonly  
434 misdiagnosed multidrug resistant pathogen *Candida auris*. *BMC Genomics*. *BMC Genomics*; 2015 Sep  
435 5;16(686):1–16.
- 436 22. Jeffares DC, Rallis C, Rieux A, Speed D, Přeavorovský M, Mourier T, et al. The genomic and  
437 phenotypic diversity of *Schizosaccharomyces pombe*. *Nat Genet*. *Nature Research*; 2015  
438 Mar;47(3):235–41.

- 439 23. Liti G, Carter DM, Moses AM, Warringer J, Parts L, James SA, et al. Population genomics of domestic  
440 and wild yeasts. *Nature* [Internet]. Nature Publishing Group; 2009 Mar 10;458(7236):337–41. Available  
441 from: <http://www.nature.com/doi/10.1038/nature07743>
- 442 24. Balashov SV, Park S, Perlin DS. Assessing resistance to the echinocandin antifungal drug caspofungin  
443 in *Candida albicans* by profiling mutations in FKS1. *Antimicrob Agents Chemother*. American Society  
444 for Microbiology; 2006 Jun;50(6):2058–63.
- 445 25. Dodgson AR, Dodgson KJ, Pujol C, Pfaller MA, Soll DR. Clade-specific flucytosine resistance is due to  
446 a single nucleotide change in the FUR1 gene of *Candida albicans*. *Antimicrob Agents Chemother*.  
447 American Society for Microbiology; 2004 Jun;48(6):2223–7.
- 448 26. Chowdhary A, Anil Kumar V, Sharma C, Prakash A, Agarwal K, Babu R, et al. Multidrug-resistant  
449 endemic clonal strain of *Candida auris* in India. *Eur J Clin Microbiol Infect Dis*. Springer Berlin  
450 Heidelberg; 2013 Dec 20;33(6):919–26.
- 451 27. Garcia-Effron G, Lee S, Park S, Cleary JD, Perlin DS. Effect of *Candida glabrata* FKS1 and FKS2  
452 mutations on echinocandin sensitivity and kinetics of 1,3-beta-D-glucan synthase: implication for the  
453 existing susceptibility breakpoint. *Antimicrob Agents Chemother*. American Society for Microbiology;  
454 2009 Sep;53(9):3690–9.
- 455

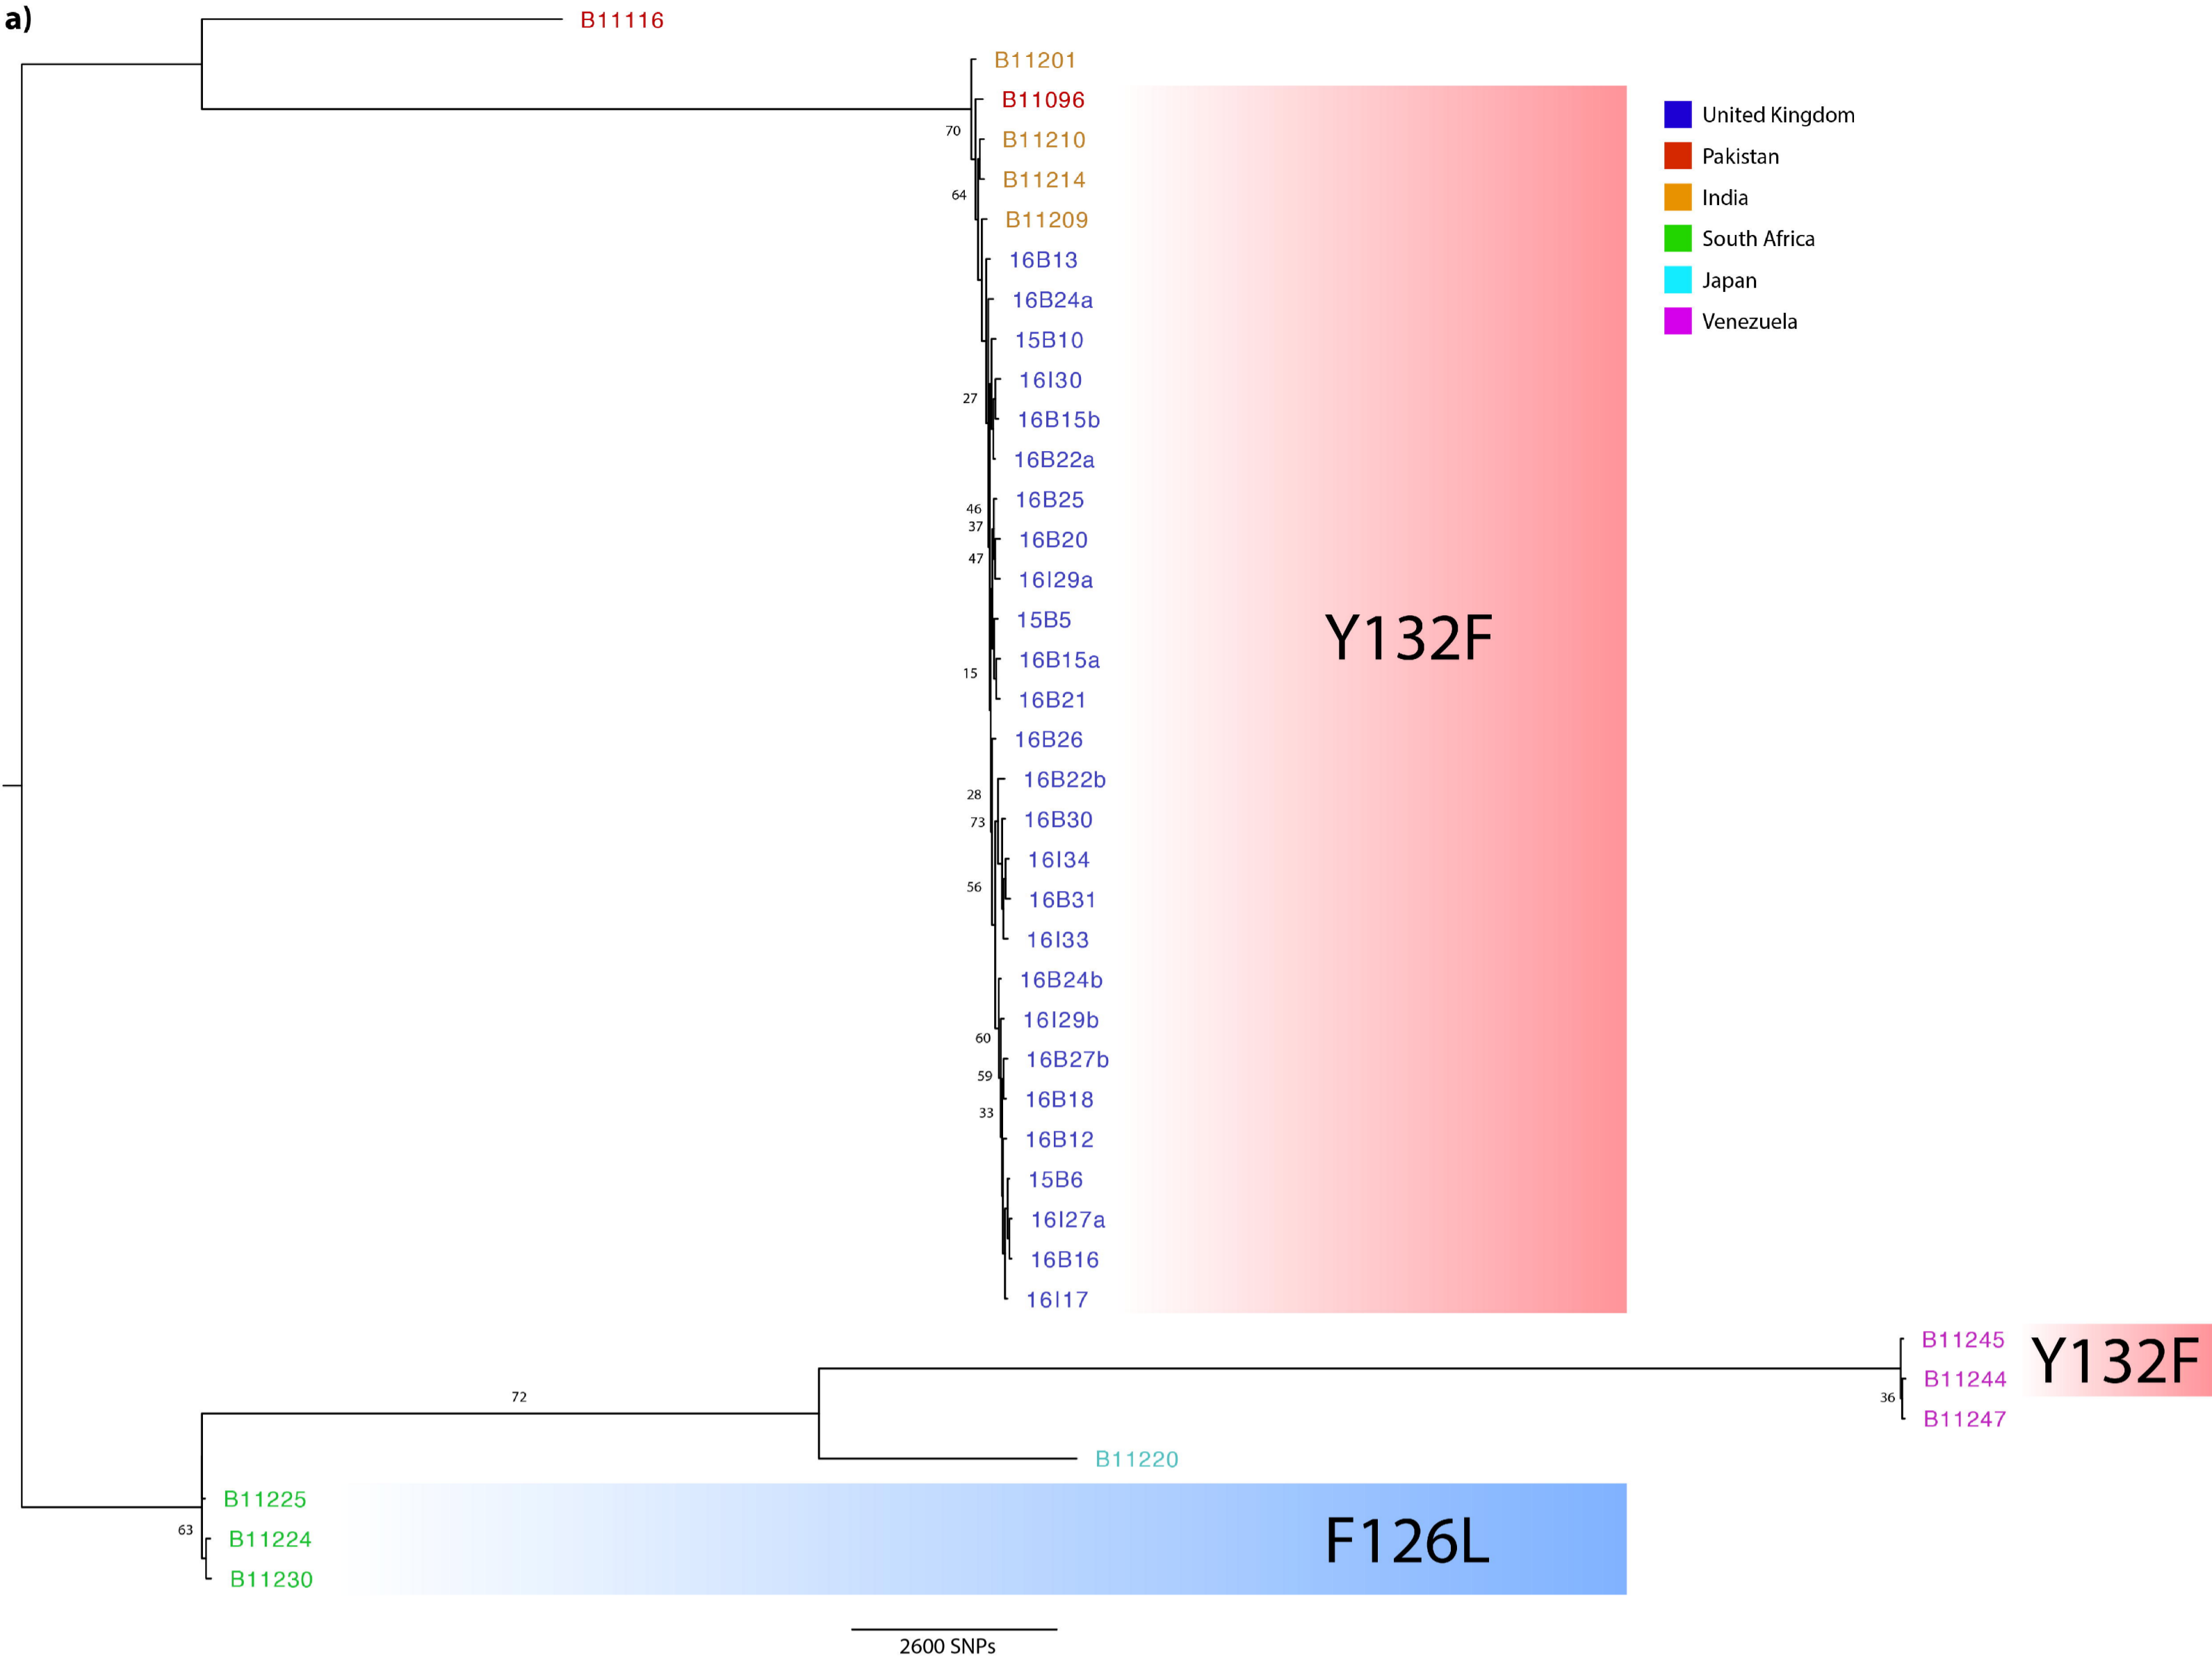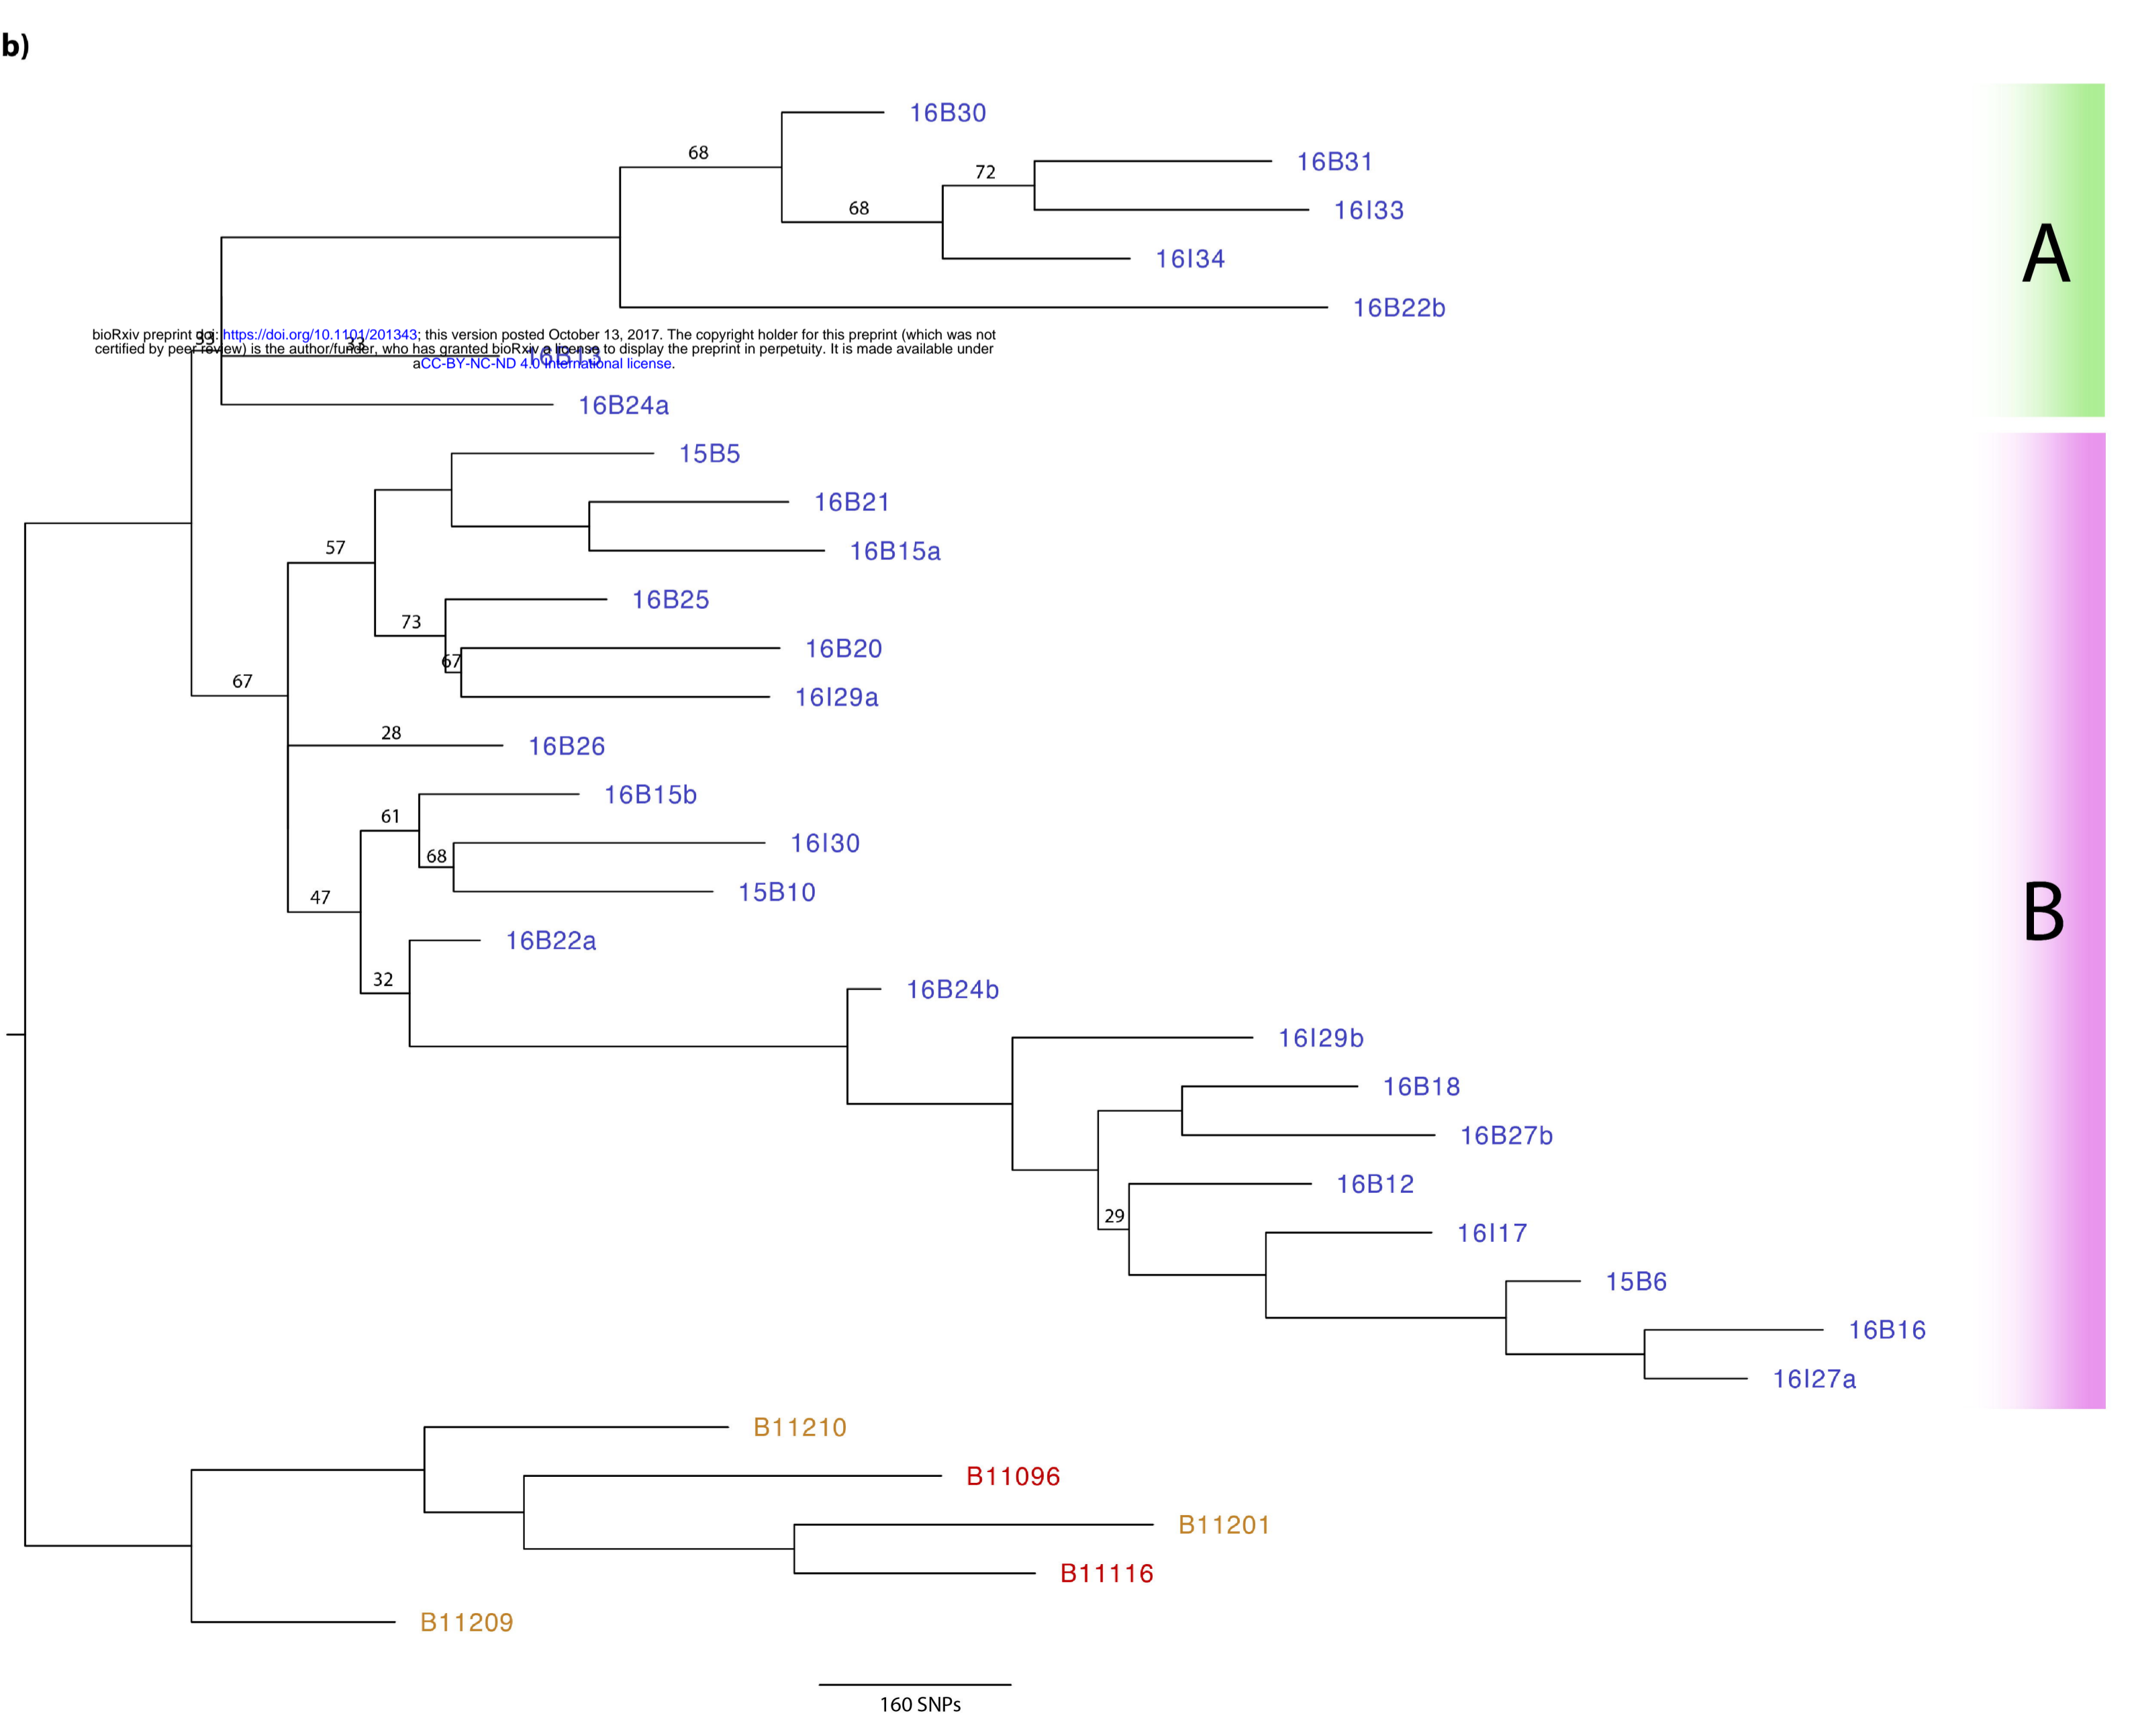

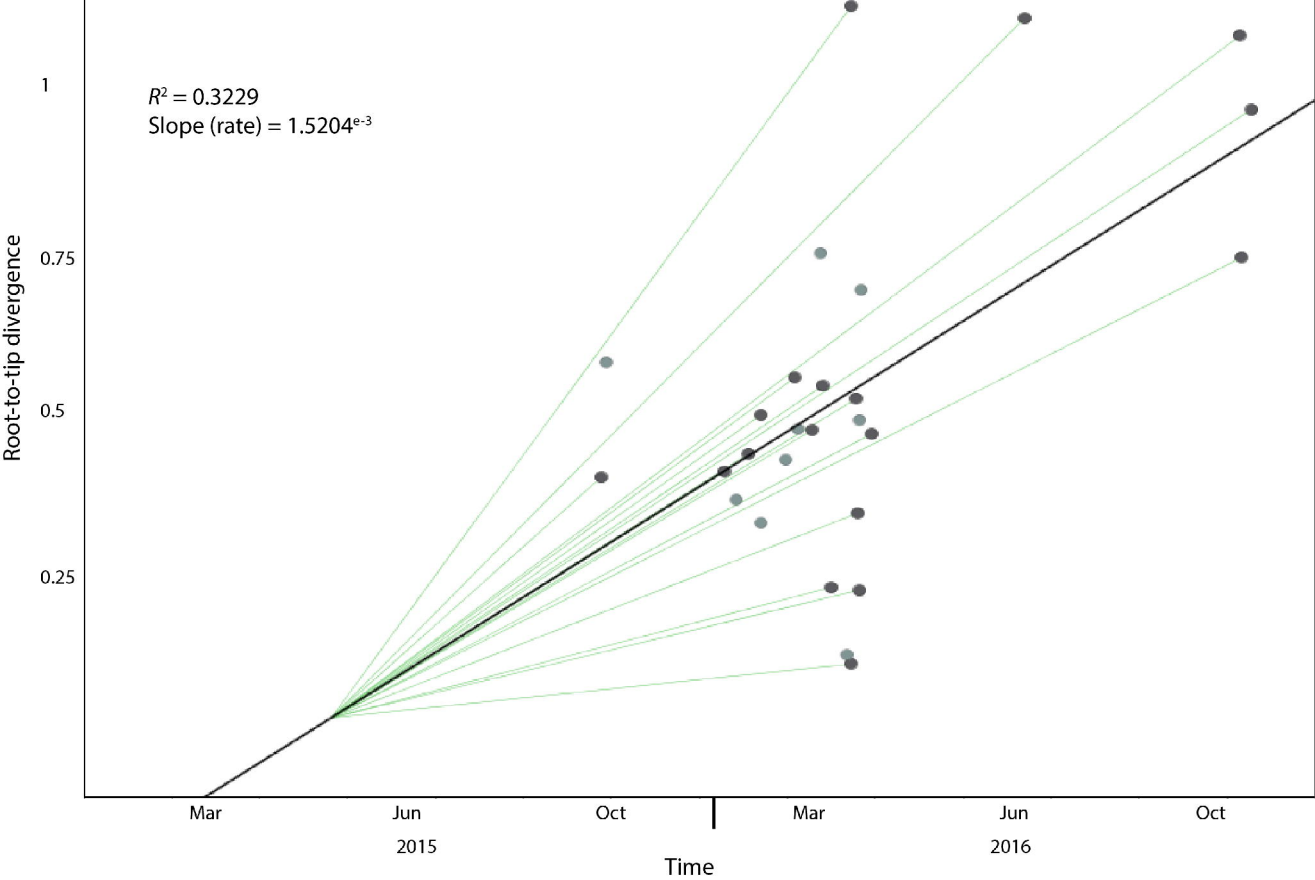

a) **Illumina short reads aligned against hybrid reference**

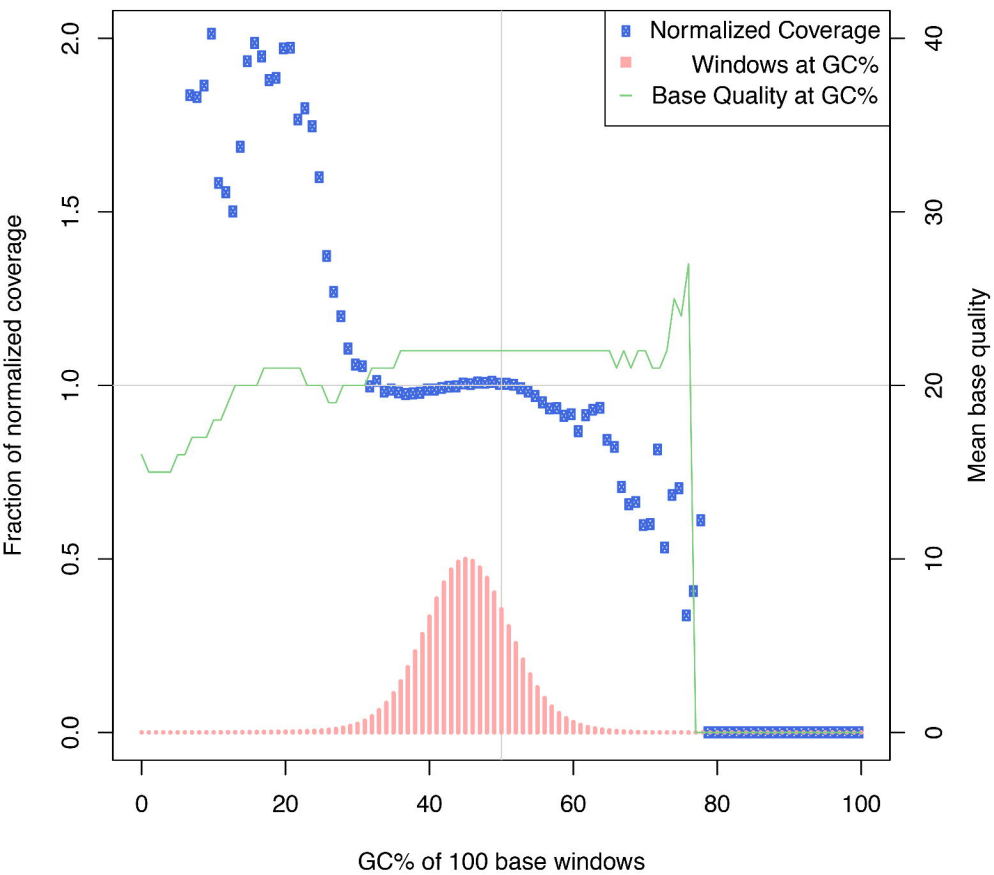

b) **ONT long reads aligned against hybrid reference**

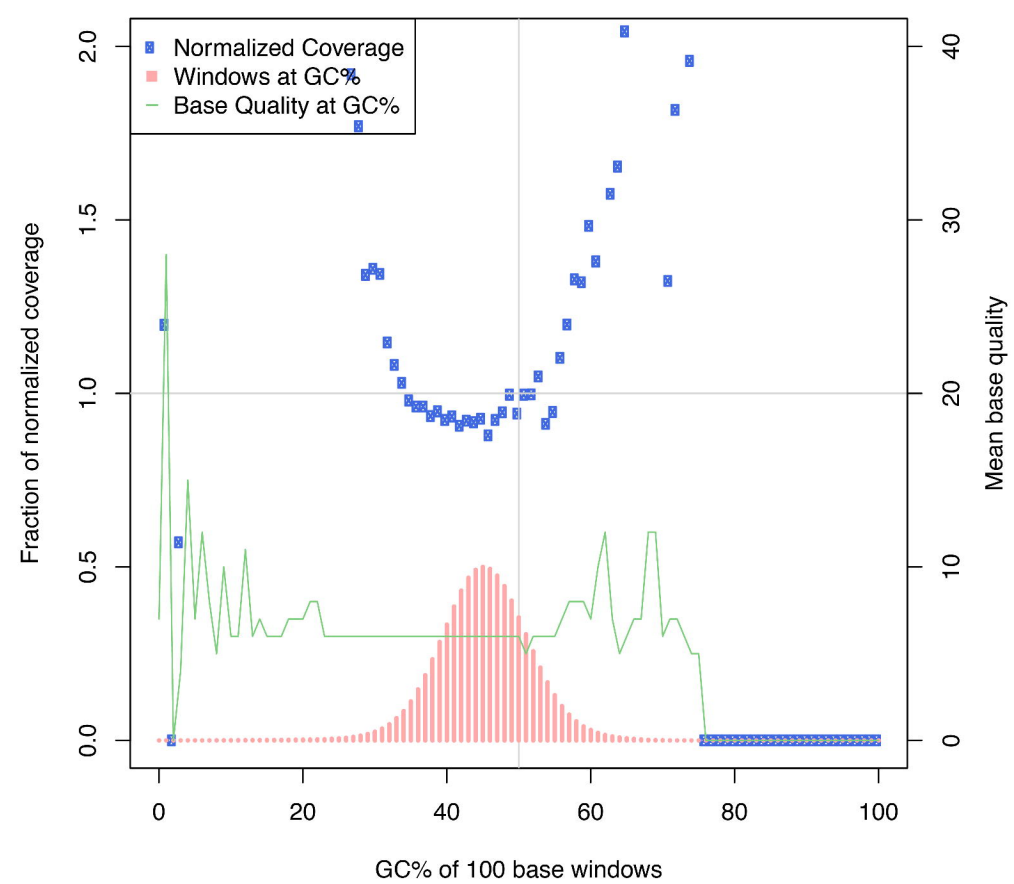

Source: https://www.biorxiv.org/content/10.1101/201343v1.full.pdf
